# Supplementary material for: Glyoxalase-I Is Upregulated in Acute Cerulein-Induced Pancreatitis: A New Mechanism in Pancreatic Inflammation?
Source: MDPI journal article supplement (doi:10.3390/antiox10101574), 2021-10-05
Supplement: s1 [file s1]

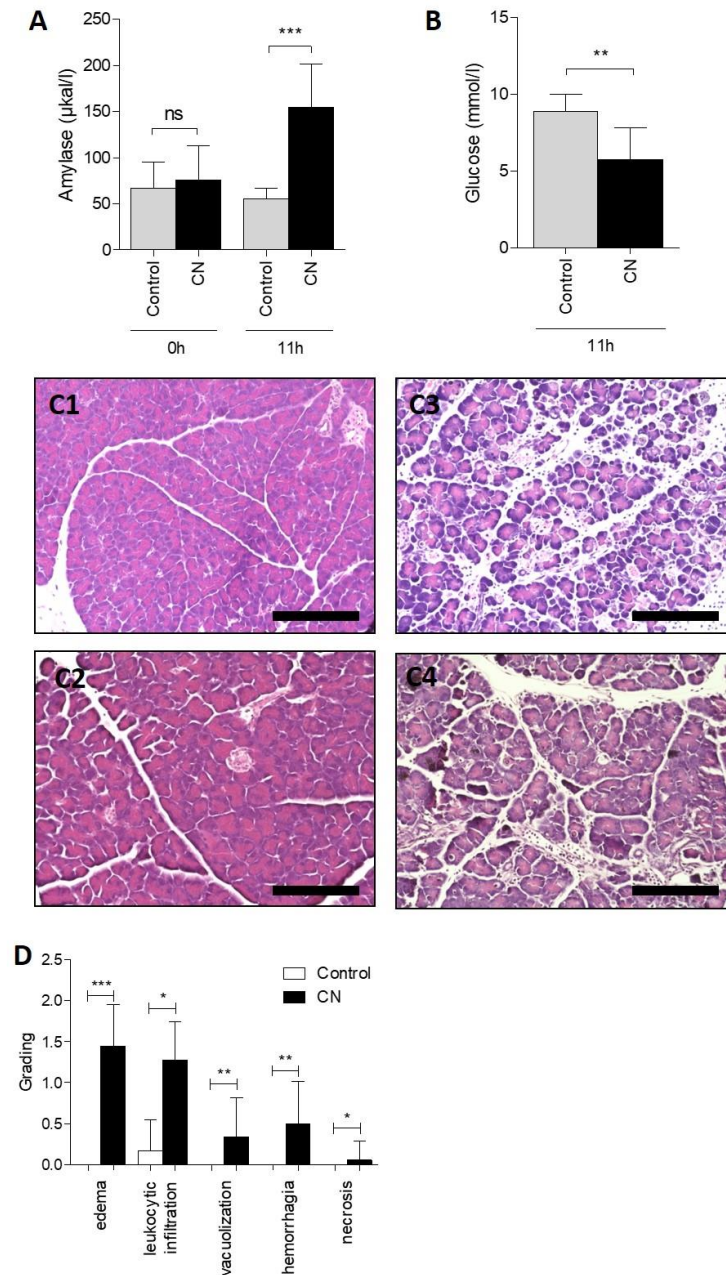

**Supplemental Figure 1: Effect of CN on severity of pancreatitis in mice.** **A-B**, Effect of CN on amylase levels and glucose in mice. CN-treated mice revealed a significant increase of amylase levels (up to 3 fold) compared to controls (**A**). In addition, CN treatment significantly reduced glucose levels (**B**). Quantification were calculated of 16 animals (8 per group) and are expressed as mean  $\pm$  S.D. **C1-C4**, representative images of HE-staining of CN-treated (**C3-C4**) and control animals (**C1-C2**). Note the edema and infiltration of inflammatory cells in the CN group. **D**, quantifications of grading of severity of pancreatitis. Six slides per pancreas were analyzed for grading of edema (0 = no; 1 = interlobular, 2 = + moderate intralobular, 3 = + severe intralobular edema), leukocytic infiltration (0 = absent, 1 = scarce perivascular, 2 = moderate perivascular and scarce diffuse, 3 = abundant diffuse infiltration), vacuolization (0 = absent, 1 = < 25%, 2 = 25-50%, 3 = > 50% of acinar cells), hemorrhagia (0 = no, 1 = 1-2, 2 = 3-5, 3 = > 5 hemorrhagic foci per slide), and necrosis (0 = no, 1 = < 15 %, 2 = 15-35 %, 3 = > 35 % of cells). Results are expressed as mean  $\pm$  S.D. from 8 animals (4 male, 4 female) per group. Scale bars: 100  $\mu$ m. \*  $P < 0.05$ , \*\* $P < 0.01$ , \*\*\* $P < 0.001$ . CN: cerulein. HE: hematoxylin eosin. Note that international SI-units were used ( $\mu$ kat/l = U/l  $\times$  0.0167).

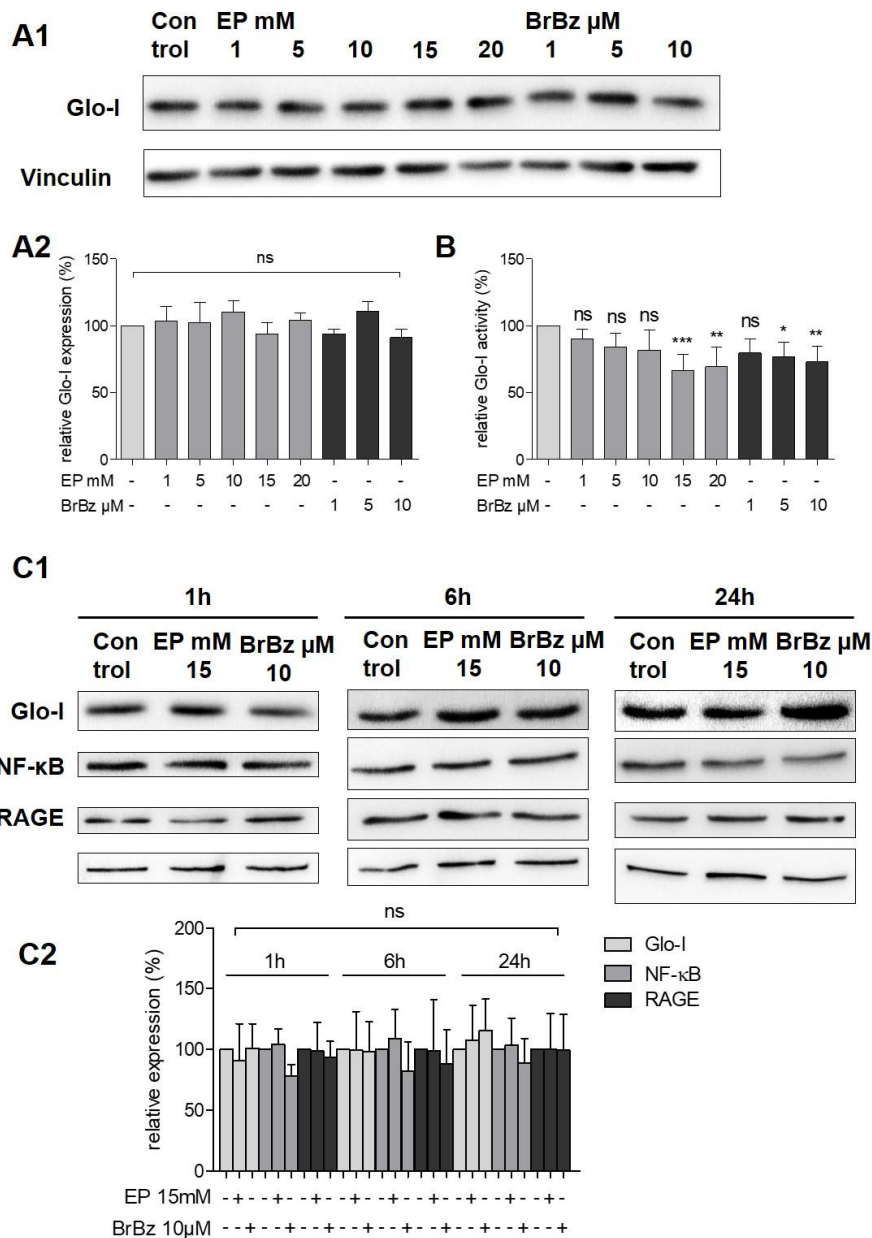

**Supplemental Figure 2: Effects of EP and BrBz on Glo-I, NF- $\kappa$ B and RAGE.** A1-A2, Effect of different doses of EP and BrBz on Glo-I expression. Neither EP nor BrBz significantly influenced protein expression of Glo-I in AR42J without CN treatment. Representative images are shown in **A1**, quantifications in **A2**. **B**, 15-20 mM EP and 5-10  $\mu$ M BrBz significantly reduced specific Glo-I activity in AR42J that were not treated with CN. **C1-C2**, Effects of EP and BrBz on Glo-I, NF- $\kappa$ B and RAGE at different incubation times. Neither EP nor BrBz significantly influenced protein expression of Glo-I, NF- $\kappa$ B or RAGE in AR42J without CN treatment after an incubation of 1 up to 24 hours. Representative images are shown in **(C1)**, quantifications in **(C2)**. Quantifications were calculated of at least three independent experiments and are expressed as mean  $\pm$  S.D. \* $P$ <0.05, \*\* $P$ <0.01, \*\*\* $P$ <0.001. EP: ethyl pyruvate, BrBz: S-p-bromobenzylglutathione cyclopentyl diester, CN: cerulein, Glo-I: Glyoxalase-I, RAGE: receptor of advanced glycation endproducts.

**A1**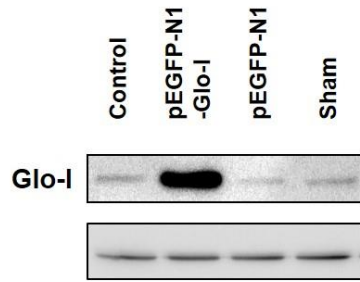**A2**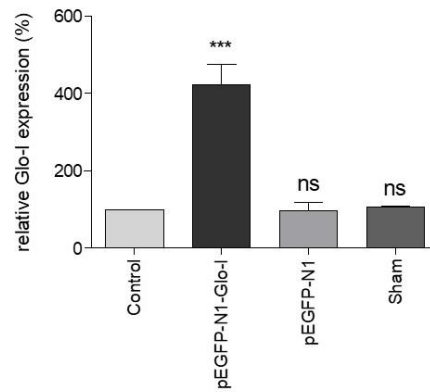**B1**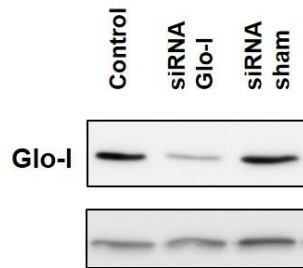**B2**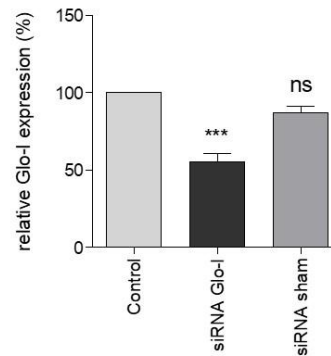

**Supplemental Figure 3: Glo-I overexpression and knockdown in AR42J.** A1-A2, Glo-I overexpression. AR42J were transfected for 24 hours with the pEGFP-Glo-I vector. Representative Western Blot images (A1) showed an upregulation of Glo-I, whereas control vector and sham transfected cells indicated no increase in Glo-I expression. Quantifications (A2) confirmed a significant upregulation of Glo-I. B1-B2, Glo-I knockdown. AR42J were transfected for 24 hours with Glo-I siRNA. Western Blot images (B1) showed a decrease in Glo-I expression in Glo-I siRNA transfected cells but not in sham transfected cells. Quantifications (B2) revealed a significant reduction in Glo-I expression up on Glo-I siRNA treatment. Quantifications were calculated of at least three independent experiments and are expressed as mean  $\pm$  S.D. \*\*\*P<0.001. Glo-I: Glyoxalase-I.

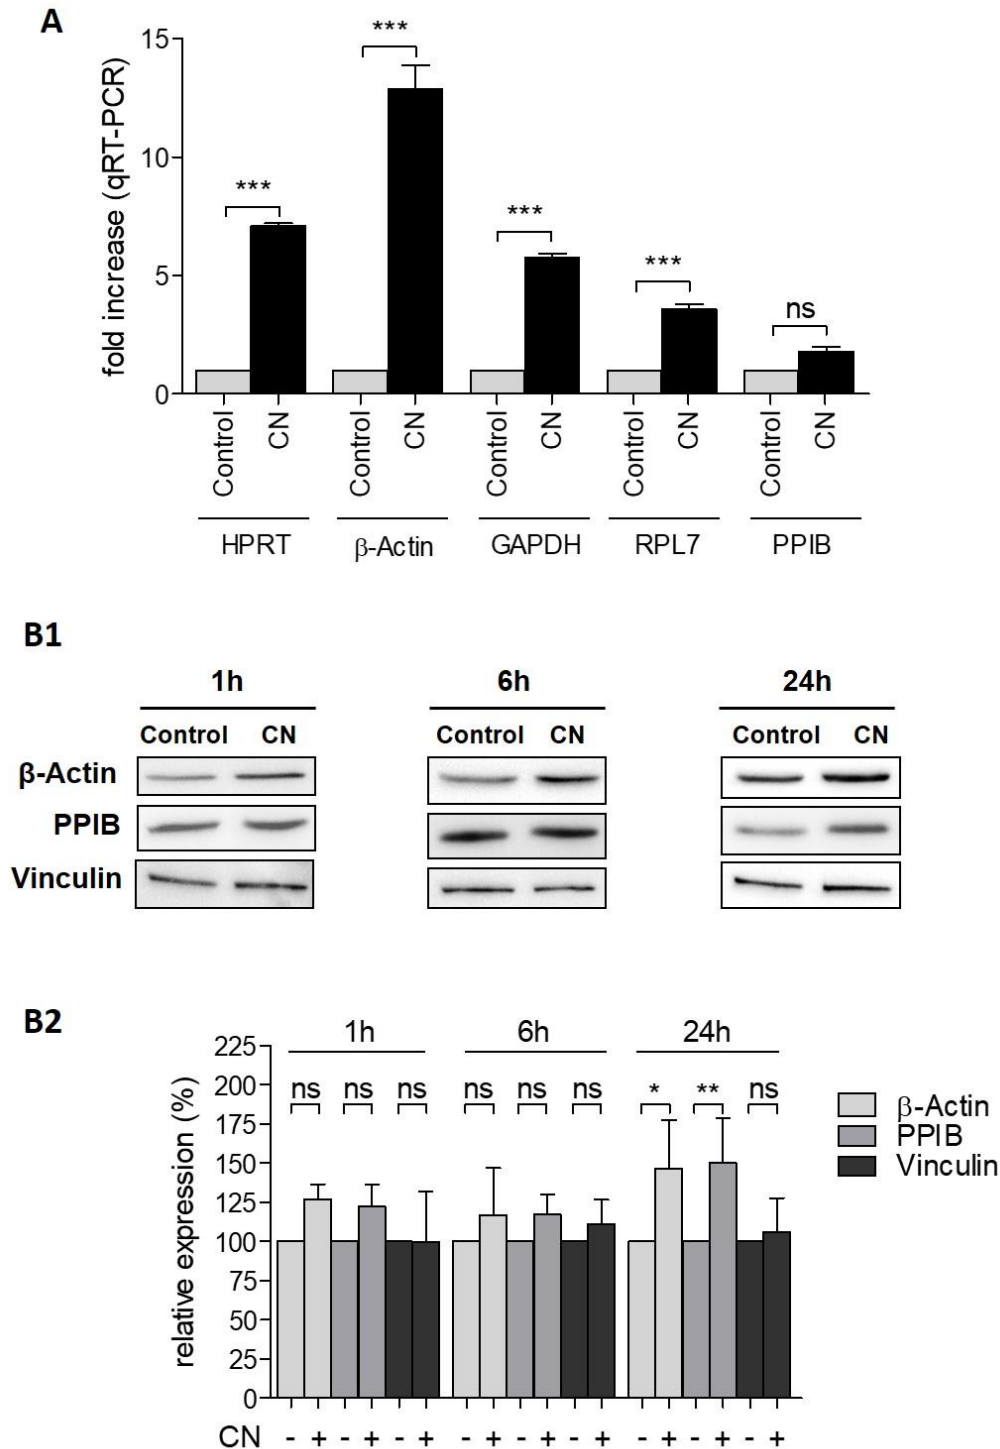

**Supplemental Figure 4: Effect of CN on housekeeping markers.** **A**, Analysis of CN influence on qRT-PCR housekeeping genes. Data indicated that only PPIB was not significantly upregulated by CN. All other housekeeping markers were significantly influenced. **B1-B2**, Effect of CN on housekeeping markers. Representative images are shown in **B1**. Quantifications (**B2**) showed that only Vinculin was not significantly induced by CN after 24 hours of incubation. For incubation times of 1 hour and 6 hours, no significant effect of CN on β-Actin, PPIB or Vinculin was demonstrated. Quantifications were calculated of at least three independent experiments and are expressed as mean  $\pm$  S.D. \*P<0.05, \*\*P<0.01, \*\*\*P<0.001. CN: cerulein.
